# Supplementary material for: Characterization and engineering of the xylose-inducible xylP promoter for use in mold fungal species
Source: PubMed Central journal article supplement (PMC9703631; doi:10.1016/j.mec.2022.e00214), 2022-11-19
Supplement: mmc1.pdf [file mmc1.pdf]

**Table S1: Oligonucleotides used in this study.** Nucleotides in small letters are add-on sequences for cloning via NEB builder; nucleotides in small letters in italics represent inserted mutations.

| Plasmid | Description                         | Primer Sequence                                                                                                                                                                                                                                                          |
|---------|-------------------------------------|--------------------------------------------------------------------------------------------------------------------------------------------------------------------------------------------------------------------------------------------------------------------------|
| pIG01V  | plasmide backbone                   | actcaagcttAAACAGCTATGACCATGATTAC<br>gcatcagtgcTGTGAAATTGTTATCCGCTC<br>caatttcacaGCACTGATGCGAGCAACAG<br>tgctgaccatGGTTGGTTCTTCGAGTCG<br>agaaccaaccATGGTCAGCAAGGGCGAG<br>gctgccatggTACTTGTACAGCTCGTCCATG<br>gtacaagtaaCCATGGCAGCAGTGATTTC<br>atagctgttAAGCTTGAGTGAGGGTTGAG |
|         | <i>pxyIP</i>                        |                                                                                                                                                                                                                                                                          |
|         | <i>mVenus</i>                       |                                                                                                                                                                                                                                                                          |
|         | <i>trpC</i> terminator              |                                                                                                                                                                                                                                                                          |
| pIG02V  | Site directed mutagenesis of pIG01V | TTCTGTTCTG <i>ggatcc</i> TATCGCCTCCATCCCTCCC<br>GCCAGCATGGCATGTCTT                                                                                                                                                                                                       |
| pIG03V  | Site directed mutagenesis on pIG01V | ATAACTCATAGATGTCTCG<br>TGTGAAATTGTTATCCGC                                                                                                                                                                                                                                |
| pIG04V  | Site directed mutagenesis on pIG01V | CAGACTAAAGTCTTCTATAGG                                                                                                                                                                                                                                                    |
| pIG05V  | Site directed mutagenesis on pIG01V | GGCAAGCATCCGTTCCCC<br>TGTGAAATTGTTATCCGCTCACAATTC                                                                                                                                                                                                                        |
| pIG06V  | Site directed mutagenesis on pIG01V | CAGAATAAAGTCCTCTCTG                                                                                                                                                                                                                                                      |
| pIG13V  | Site directed mutagenesis on pIG01V | tgatagagaACGATGTCTTCTATCACAC<br>ctgataggaTACTTATAACAGAAAGC                                                                                                                                                                                                               |
| pIG15V  | pIG01V backbone                     | cttgacgacaATGGTCAGCAAGGGCGAG<br>agaaccaaccTGTGAAATTGTTATCCGCTCACAATTC<br>caatttcacaGGTTGGTTCTTCGAGTCG                                                                                                                                                                    |
|         | <i>pxyIP</i> reverse complementary  | tgctgaccatTGTCGTCAAGATTGTAGTG                                                                                                                                                                                                                                            |
| pIG16V  | Site directed mutagenesis on pIG01V | AATAAAGTCCTCTCTGCG<br>ATGACGTCTATCACCTCC                                                                                                                                                                                                                                 |
| pIG17V  | Site directed mutagenesis on pIG01V | AGCATTTA <i>cat</i> TAAAAAAATGATGGAAC<br>CCTATAGAAGACTTTAGTCTGTGTG                                                                                                                                                                                                       |
| pIG19V  | Site directed mutagenesis on pIG01V | CAGAATAAAGTCCTCTCTG<br>TATTTTATCCAAGATCCTAGT                                                                                                                                                                                                                             |
| pIG20V  | Site directed mutagenesis on pIG01V | TGTAAATTCGTTCTCCATTCGTGAAC<br>GAGTGCATGTGGGGCACG                                                                                                                                                                                                                         |
| pIG21V  | Site directed mutagenesis on pIG01V | AAAATGATGGAACATTATTTTCATC                                                                                                                                                                                                                                                |

|               |                                     |                                                                                                                                 |
|---------------|-------------------------------------|---------------------------------------------------------------------------------------------------------------------------------|
| pIG22V        | Site directed mutagenesis on pIG01V | GGCAAGCATCCGTTCCC<br>ATTTTTTTAGCCTAAATGCTCCTATAGAAGAC                                                                           |
| pIG23V        | Site directed mutagenesis on pIG01V | TATTTTCGACAAGATCCTAGTAAATATTTAGGAT<br>AAAT                                                                                      |
| pIG01L        | plasmide backbone                   | AAACAGCTATGACCATGATTAC<br>TGTGAAATTGTTATCCGCTC                                                                                  |
|               | <i>pxyIP</i>                        | agcggataacaatttcacaGCACTGATGCGAGCAACAG<br>atgttcttggcgtcctccatGGTTGGTTCTTCGAGTCG                                                |
|               | <i>luc</i>                          | catcgactcgaagaaccaaccATGGAGGACGCCAAGAAC<br>gaaatcactgctgccatggCTAGACGGCGATCTTGCCGCC                                             |
|               | <i>trpC</i> terminator              | ggcggcaagatcgccgtctagCCATGGCAGCAGTGATTTC<br>aatcatggtcatagctgttAAGCTTGAGTGAGGGTTG                                               |
| pIG07L        | Site directed mutagenesis on pIG01L | TGTA AATTCGTTCTCCATTCG                                                                                                          |
| pIG24L        |                                     | GCGAGAATTTA <i>cat</i> TAAAGAAAGATC<br>GATCTTTCTTTAATGTAAATTCTCGC                                                               |
| $\Delta xlnR$ | 5'NCR                               | GCCCTTCTGGCCAGGGTG<br>tagttctgttaccgagccggCCTCACGGGTGAAGCAGAGC                                                                  |
|               | 3'NCR                               | gctctgaacgatatgctcccGATTGAGCTCGTGTTTCG<br>CCGTTTCTTTGCTGCGTCC                                                                   |
|               | <i>hph</i>                          | ccggctcggtaacagaactaACGGCGTAACCAAAAAGTCAC<br>gggagcatatcgttcagagcTCTTGACGACCGTTGATCTG                                           |
|               | fusion cassette                     | TTCACTTCAGAATTCCCCTCGC<br>TACGGGAGACAAAGGCGAG                                                                                   |
| TetOn         | plasmide backbone                   | AAACAGCTATGACCATGATTAC<br>TGTGAAATTGTTATCCGCTC                                                                                  |
|               | TetOn <sup><i>oliC</i></sup>        | atcacacggcctgagtgccATGGAGGACGCCAAGAACAT<br>atgttcttggcgtcctccatGGCCACTCAGGCCGTGTGAT                                             |
|               | <i>luc</i>                          | atcacacggcctgagtgccATGGAGGACGCCAAGAACAT<br>ccgcttgagcagacatcaccATGGAGGACGCCAAGAACAT<br>gaaatcactgctgccatggCTAGACGGCGATCTTGCCGCC |
|               | <i>trpC</i> terminator              | ggcggcaagatcgccgtctagCCATGGCAGCAGTGATTTC                                                                                        |

---

**Table S2. Table showing the raw fluorescence values of three biological replicates from one transformant.**

(A) Raw values of mVenus reporter assays shown in Table 2. (B) Raw values of mVenus reporter assays shown in Figure 3.

**A**

|       |   | 1%Xyl | 1%Glc<br>0%Xyl | 1%Glc<br>0.1%Xyl | 1%Glc<br>0.5%Xyl | 1%Glc<br>1%Xyl | 1%Fru<br>0%Xyl | 1%Fru<br>0.1%Xyl |
|-------|---|-------|----------------|------------------|------------------|----------------|----------------|------------------|
| IG01V | 1 | 37585 | 878            | 1665             | 9707             | 14130          | 844            | 37446            |
|       | 2 | 42973 | 839            | 1680             | 9206             | 14446          | 845            | 38583            |
|       | 3 | 44050 | 873            | 1678             | 10008            | 14390          | 864            | 37097            |
| wt    | 1 | 839   | 852            | 851              | 899              | 911            | 801            | 844              |
|       | 2 | 845   | 894            | 862              | 855              | 954            | 811            | 877              |
|       | 3 | 840   | 911            | 825              | 1001             | 977            | 821            | 857              |

**B**

|       |  | 1%Fru<br>0.1%Xyl |       |       | 1%Glc<br>0.1%Xyl |      |      |
|-------|--|------------------|-------|-------|------------------|------|------|
|       |  | 1                | 2     | 3     | 1                | 2    | 3    |
| IG01V |  | 29054            | 28733 | 28293 | 1678             | 1598 | 1605 |
| IG02V |  | 3262             | 3205  | 3049  | 1006             | 959  | 969  |
| IG03V |  | 24766            | 23554 | 22991 | 1508             | 1526 | 1511 |
| IG04V |  | 25003            | 25484 | 25528 | 1263             | 1268 | 1283 |
| IG05V |  | 2535             | 2455  | 2484  | 929              | 943  | 955  |
| IG06V |  | 2301             | 2277  | 2200  | 1067             | 1089 | 1057 |
| IG07V |  | 29942            | 28047 | 28893 | 1722             | 1711 | 1727 |
| IG13V |  | 7015             | 7093  | 6858  | 1061             | 1096 | 1093 |
| IG15V |  | 14226            | 13865 | 12931 | 1256             | 1220 | 1237 |
| IG16V |  | 27021            | 26547 | 25632 | 1720             | 1702 | 1724 |
| IG17V |  | 4182             | 4077  | 4172  | 949              | 934  | 938  |
| IG18V |  | 7857             | 7500  | 7461  | 1102             | 1114 | 1111 |
| IG19V |  | 849              | 819   | 829   | 872              | 823  | 863  |
| IG20V |  | 1532             | 1511  | 1442  | 972              | 955  | 995  |
| IG21V |  | 4419             | 4209  | 4142  | 901              | 907  | 897  |
| IG22V |  | 11593            | 11050 | 11610 | 894              | 862  | 883  |
| IG23V |  | 18761            | 17182 | 17367 | 1012             | 1082 | 1020 |
| wt    |  | 939              | 945   | 940   | 952              | 994  | 986  |

**Table S3. Table showing the raw bioluminescence values of three biological replicates from one transformant.** (A) Raw values of the luciferase reporter assays shown in Figure 5A. (B) Raw values of the luciferase reporter assays shown in Figure 5B.

A

|       | 1%Glc |      |      | 1% Glc<br>0.1% Xyl |       |       | 1% Fru<br>0.1% Xyl |        |        |
|-------|-------|------|------|--------------------|-------|-------|--------------------|--------|--------|
|       | 1     | 2    | 3    | 1                  | 2     | 3     | 1                  | 2      | 3      |
| IG01L | 71    | 76   | 94   | 29483              | 18180 | 23881 | 270637             | 229934 | 189231 |
| IG03L | 130   | 97   | 129  | 23518              | 19031 | 17379 | 217046             | 187671 | 187358 |
| IG04L | 107   | 174  | 176  | 14903              | 15133 | 12311 | 242450             | 194827 | 218638 |
| IG06L | 3127  | 2736 | 2862 | 5055               | 5640  | 5911  | 25667              | 25198  | 23684  |
| IG07L | 4833  | 3159 | 3266 | 3024               | 3177  | 3858  | 3111               | 3220   | 2569   |
| IG24L | 316   | 546  | 411  | 600                | 451   | 698   | 556                | 789    | 873    |
| wt    | 18    | 23   | 39   | 72                 | 70    | 99    | 392                | 350    | 285    |

B

|         | 1%Glc |      |      | 1%Glc<br>0.1%Xyl |       |       | 1%Fru<br>0.1%Xyl |        |        |
|---------|-------|------|------|------------------|-------|-------|------------------|--------|--------|
|         | 1     | 2    | 3    | 1                | 2     | 3     | 1                | 2      | 3      |
| IG03L*  | 414   | 366  | 410  | 322              | 303   | 559   | 470              | 490    | 307    |
| IG04L*  | 881   | 1213 | 675  | 681              | 963   | 703   | 1318             | 912    | 1037   |
| IG06L*  | 4935  | 4232 | 4481 | 5911             | 4538  | 5155  | 5091             | 5259   | 4874   |
| IG07L*  | 3577  | 5158 | 4729 | 4070             | 5237  | 3551  | 4572             | 3579   | 3379   |
| IG024L* | 492   | 429  | 448  | 409              | 412   | 387   | 489              | 487    | 546    |
| wt      | 26    | 23   | 20   | 57               | 60    | 70    | 319              | 349    | 262    |
| IG01L   | 72    | 62   | 83   | 13014            | 11702 | 14491 | 131233           | 131553 | 104809 |

**Table S4. Table showing the raw bioluminescence values of three biological replicates from one transformant.** (A) Raw values of the luciferase reporter assays shown in Table 3. (B) Raw values of the luciferase reporter assays shown in Table 4.

A

|       | 1%Glc             |       |       | 1%Glc<br>0.01%Xyl |       |       | 1%Glc<br>0.02%Xyl |        |        | 1%Glc<br>0.03%Xyl |      |      |
|-------|-------------------|-------|-------|-------------------|-------|-------|-------------------|--------|--------|-------------------|------|------|
|       | 1                 | 2     | 3     | 1                 | 2     | 3     | 1                 | 2      | 3      | 1                 | 2    | 3    |
| IG25L | 70                | 61    | 71    | 440               | 1391  | 1107  | 5212              | 3489   | 1619   | 10697             | 8707 | 6167 |
| IG3L  | 87                | 65    | 58    | 197               | 244   | 429   | 1469              | 1198   | 1846   | 5167              | 4633 | 4706 |
| wt    | 59                | 67    | 58    | 171               | 276   | 317   | 476               | 502    | 596    | 885               | 861  | 699  |
|       | 1%Glc<br>0.05%Xyl |       |       | 1%Glc<br>0.1%Xyl  |       |       | 1%Fru<br>0.1%Xyl  |        |        |                   |      |      |
|       | 1                 | 2     | 3     | 1                 | 2     | 3     | 1                 | 2      | 3      |                   |      |      |
| IG25L | 26414             | 18692 | 27279 | 71066             | 85803 | 78798 | 346319            | 320536 | 300154 |                   |      |      |
| IG3L  | 3039              | 3524  | 3592  | 31076             | 27174 | 20314 | 300281            | 232600 | 267174 |                   |      |      |
| wt    | 45                | 42    | 50    | 108               | 107   | 221   | 539               | 522    | 427    |                   |      |      |

B

|                       | 1%Glc |     |     | 1%Glc<br>0.1%Xyl     |       |       | 1%Fru<br>0.1%Xyl     |       |       |
|-----------------------|-------|-----|-----|----------------------|-------|-------|----------------------|-------|-------|
|                       | 1     | 2   | 3   | 1                    | 2     | 3     | 1                    | 2     | 3     |
| IG01L                 | 44    | 38  | 57  | 10142                | 10024 | 11484 | 79897                | 63135 | 59041 |
| wt                    | 14    | 18  | 21  | 15                   | 25    | 19    | 24                   | 36    | 28    |
|                       | 1%Glc |     |     | 1%Glc<br>10µg/ml Dox |       |       | 1%Glc<br>20µg/ml Dox |       |       |
|                       | 1     | 2   | 3   | 1                    | 2     | 3     | 1                    | 2     | 3     |
| TetOn <sup>olic</sup> | 148   | 136 | 147 | 6889                 | 6872  | 6087  | 16775                | 14336 | 14941 |
| wt                    | 14    | 18  | 21  | 11                   | 12    | 11    | 9                    | 10    | 16    |

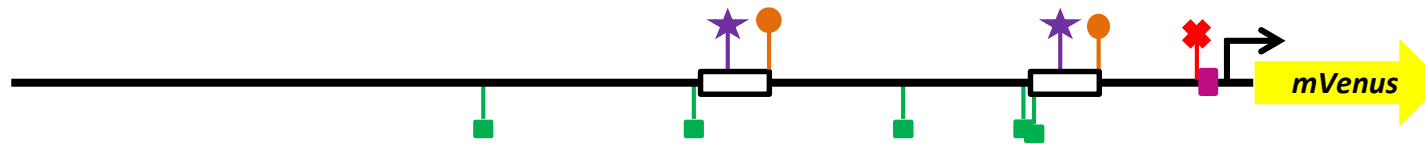

**A** ✖ **TATAA motif**

wt: 5'-TG**TATAAGTA**

IG02V: 5'-TG**GGATCCTA**

■ **Pyrimidine-rich sequence**

wt: 5'-**TATCGCCTCCATCCCTCCCGAC**

IG13V: 5'-**TATCCCTATCAGTGATAGAGAAC**

★ **XlnR motif**

wt: 5'-**TAGGCTAAAA**

IG17V: 5'-**TACATTAAATA**

● **GATAA motif**

wt: 5'-TG**GATAAAA**

IG23V: 5'-TG**TCGAAA**

□ **Distal 91bpDS truncation**

wt: 5'-**CAGACTAAAGTCTTCTATAGGAGCATTTAGGCTAAA**AAAATGATGGAACATTATTT**CATCCTAAATATTTACTAGGATCTTGGATAAAATA**

IG21V: 5'-**-----AAAATGATGGAACATTATTT**CATCCTAAATATTTACTAGGATCTTGGATAAAATA****

IG22V: 5'-**CAGACTAAAGTCTTCTATAGGAGCATTTAGGCTAAA**AAAAT**-----**

Proximal 91bpDS truncation □

wt: 5'-**CAGAA**TAAAGTCC**TCTCTGC**GAGAA**TTTAGGCTAAAGAAAGATCGACTATA**ATTT**CATCCGAGCTATTTGTTAGGATTTTGGATAAAATA**

IG20V: 5'-**-----**

**B** IG25L: 5'-**CAGAT**TAAAGT**CATCTTT**CAGAG**GATTTAGGCTAAACAAAGATAGATGAT**CATTT**CATCCTATT**TATTT**CGTAGGATGTTGGATAAAATA**

**Figure S1. Analyzed mutations and deletions in pxyIP.** (A) Putative binding motifs for transcription factors : TATAA in red, GATAA in orange, XlnR (5'-GGCTAAA) in purple and pyrimidine-rich sequence in pink. Mutations are in blue and deletions are marked by blue dashes. (B) Sequence of the third integrated 91bpDS synthetic DNA fragment with 70% similarity to the other two 91bpDS (for cloning reasons, we used the 5'-extension 5-GTGCCCCACATTGTATC-containing fragment. The exchanged, non-conserved nucleotides are shown in blue.

A

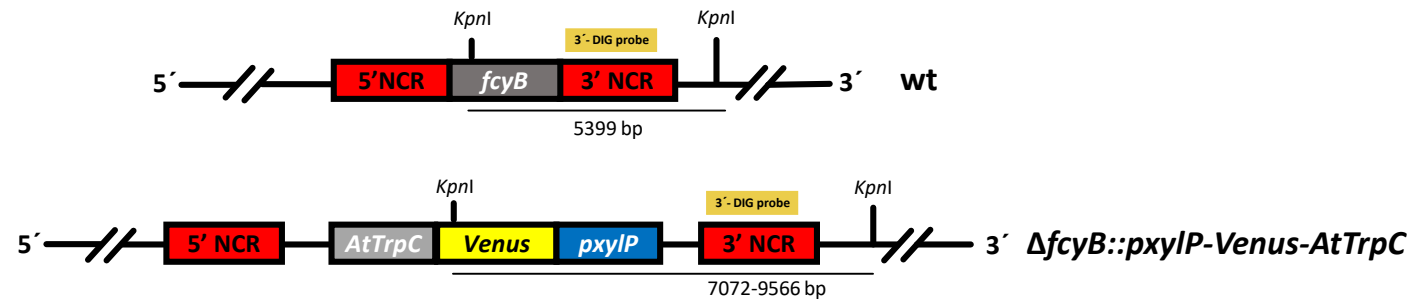

B

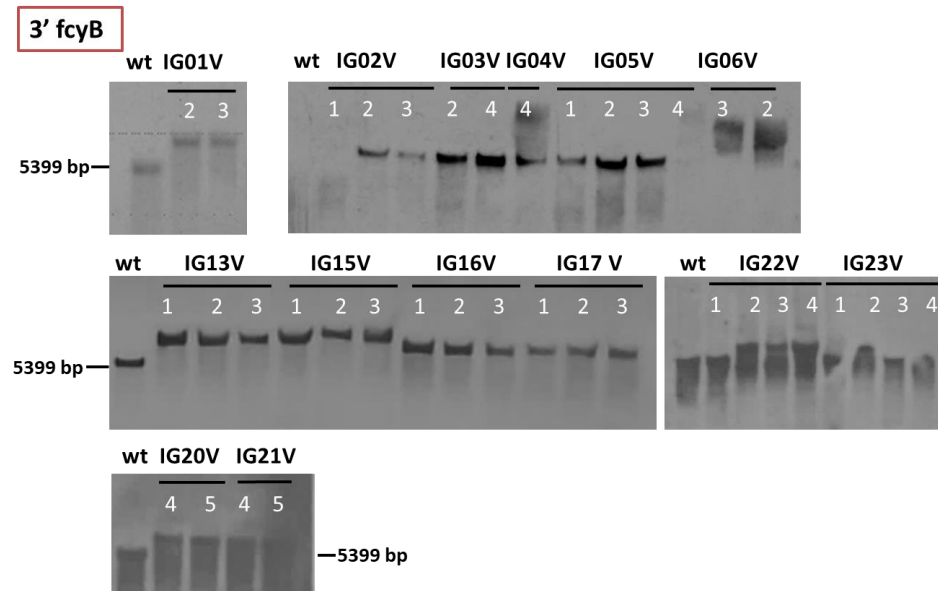

**Figure S2. Scheme for the genomic integration of the *pxyIP* mVenus reporter constructs at the *fcyB* locus.** (A) Genomic organization of the *fcyB* locus in wt (wild-type) and  $\Delta fcyB$ . Generated gDNA digestion with *KpnI* resulted in a 5399-bp fragment for wt *pxyIP* and fragments ranging from 7072-9566 bp for the different *pxyIP* versions. (B) Southern blot analysis using respective DIG hybridization probes confirmed genetic manipulations.

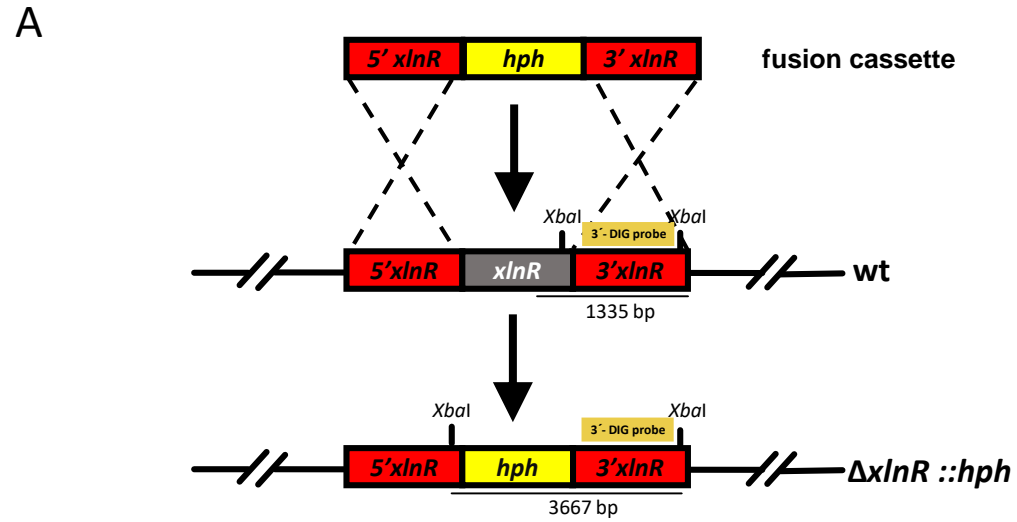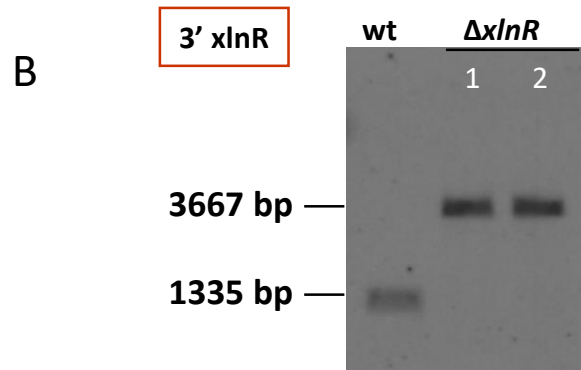

**Figure S3. Scheme for *xlnR* deletion in *A. fumigatus*.** (A) Genomic organization of the *xlnR* locus in wt and  $\Delta$ *xlnR*. Generated gDNA digestion with *Xba*I resulted in a 1335-bp and 3667-bp fragments for wt and  $\Delta$ *xlnR*, respectively. (B) Southern blot analysis using respective DIG hybridization probe confirmed genetic manipulation.



A

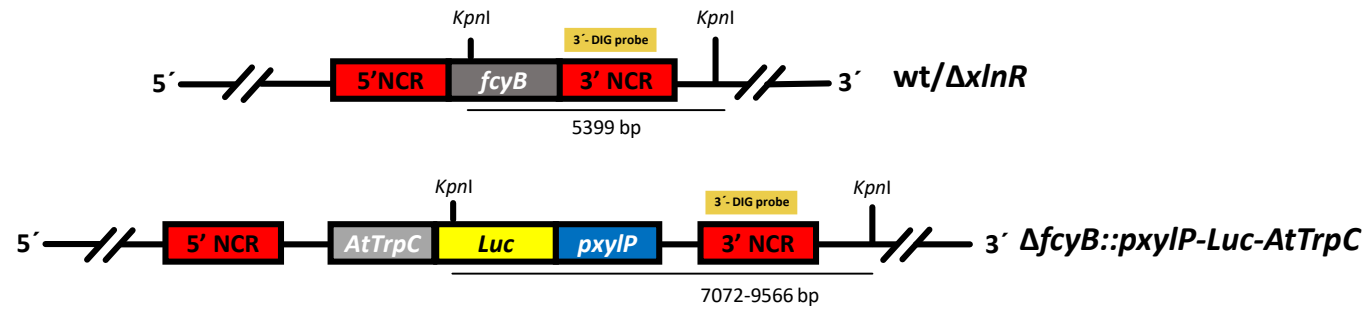

wt

B

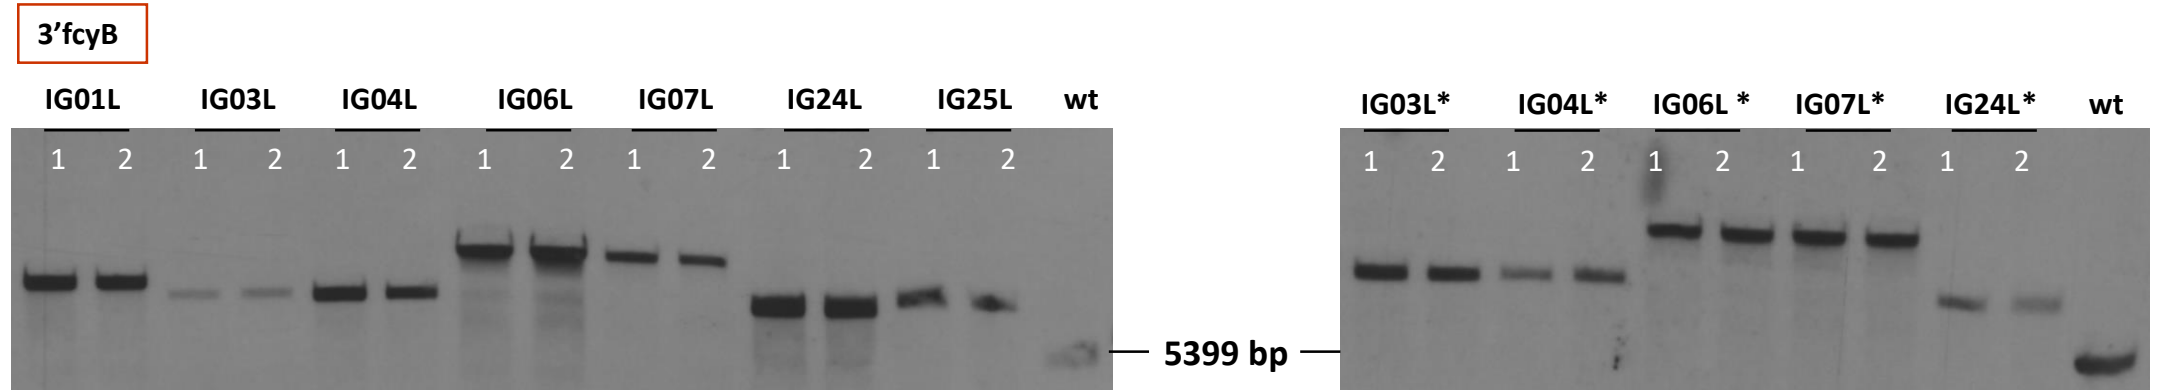

**Figure S4. Scheme for the genomic integration of *pxylP* versions controlling luciferase-encoding gene at the *fcyB* locus.** (A) Genomic organization of the *fcyB* locus in *wt* and *ΔfcyB*. Generated gDNA digestion with *KpnI* resulted in a 5399-bp fragment for *wt/ΔxlnR* and fragments ranging from 7072-9566 bp for the different *pxylP* versions. (B) Southern blot analysis using respective DIG hybridization probe confirmed genetic manipulation.

A

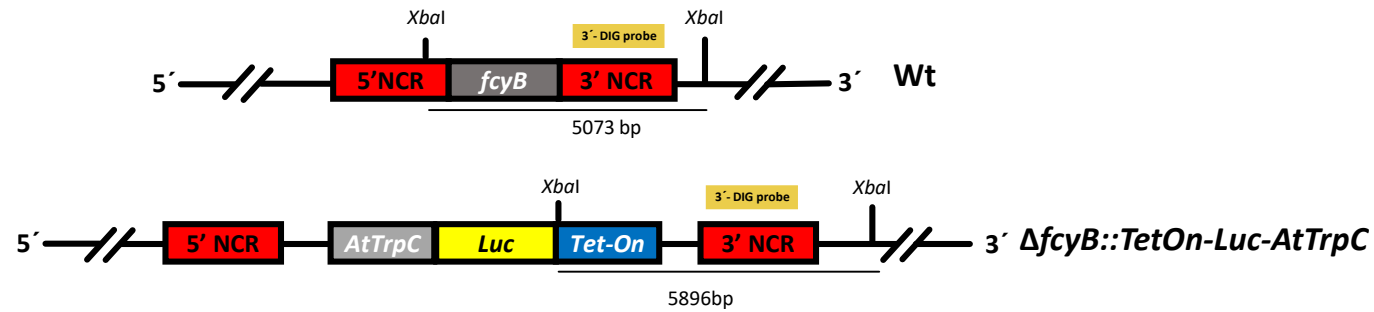

B

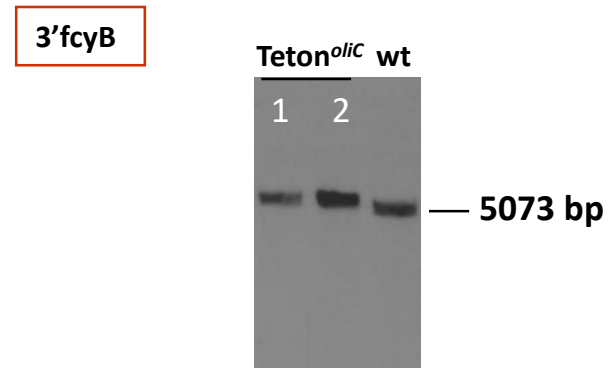

**Figure S5. Scheme for genetic integration of the TetOn firefly luciferase reporter constructs at the *fcyB* locus.** (A) Genomic organization of the *fcyB* locus in wt and  $\Delta fcyB$ . Generated gDNA digestion with *XbaI* resulted in a 5073-bp fragment for wt and fragments ranging from 5896 bp for the different *pxyIP* versions. (B) Southern blot analysis using respective DIG hybridization probe confirmed genetic manipulation.
